# Supplementary material for: The grain-scale signature of isotopic diffusion in ice
Source: Copernicus journal article supplement (doi:10.5194/egusphere-2024-1012), 2024-04-23
Supplement: Supplementary file [file egusphere-2024-1012-RC2-supplement.pdf]

## The grain-scale signature of isotopic diffusion in ice by Felix S.L. Ng

### General Comments

This paper deals with the modeling of the diffusion of stable water isotopes occurring in polycrystalline ice. The overall motivation of this work is to explore mechanisms that could explain the “excess diffusion” of stable water isotopes observed in some ice-cores. Understanding and quantifying diffusion of stable isotopes in ice cores is important as they are used as proxies for the reconstruction of past temperatures and post-deposition effects need to be quantified for a fine interpretation of these paleo-records.

Specifically, the paper models the combined impact of liquid water veins and crystals grain boundaries in the diffusion of water isotopes and to quantify the enhancement of the smoothing of isotopic signals (compared to a scenario considering diffusion through the ice phase only).

To my view, the paper offers three main points:

- The equations to model an idealized polycrystalline ice, including a water vein and grain boundaries, and a numerical methodology to solve them.
- To demonstrate the formation of specific spatial patterns, around the water vein and crystal boundaries, which constitute a robust signature of the proposed mechanisms to explain excess diffusion.
- To quantify the role of water veins and grain boundaries to the enhancement factor of diffusive-smoothing.

The paper is well constructed, follows a sound methodology, and offers valuable results for the interpretation of ice cores. I therefore think it is suited for the *The Cryosphere* and suggests minor corrections.

My main remarks are:

**1** – I think the paper would benefit from a more systematic use of citations to published literature. It would help the reader not familiar with the overall scientific context and with the techniques used in the paper. Some examples are given in the specific comments below, but for instance one example that comes to my mind is L249 that refers to “past theories” without mentioning them (I guess the author meant Rempel and Wettlaufer et al., 2003).

**2** – The author assumes equilibrium fractionation at the interfaces between the grains boundaries, the vein, and the ice (L230). From what I understand, this assumption simplifies the system of equations (as  $N_v$  and  $N_b$  are now direct functions of  $N_s$  at these interfaces). Is it a common assumption for the diffusion of isotopes in polycrystalline ice? Also, since there is transport in the problem, I think that non-equilibrium fractionation could be possible. If so, what could be the impact on the diffusion of water isotopes? Can we justify that it is small?

**3** – The paper mainly focus on the role of water vein and grain boundaries, and so little emphasis is put on grain size (which was studied before if I got it correctly). I understand this choice, but I’m still wondering to what extent the enhancement factor depends on the grain size. Section 3.2 refers to Rempel and Wettlaufer (2003) for this effect and mentions

that the proposed model predict the same trends. Is it possible to mention them in the paper and to estimate what kind of impact can we expect the grain sizes variations observed in ice cores?

Still on grain size, the abstract and Section 4.1 mention that the patterns of  $\delta$  correspond to 10 to 50% of the grain radius. Do they really scale with grain radius (i.e. does the 10-50% holds for very large or very small grain sizes or it is valid for millimeter grain sizes only)?

### Specific remarks:

**L19** I would rather write things in percents when possible, as I find them more natural to read (“10-50% of the grain size radius” rather than “0.1-0.5 of the grain size radius”).

**L29** Add references to the use of  $\delta^{18}\text{O}$  and  $\delta\text{D}$  in ice cores.

**L32** Perhaps add general references to signal smoothing in ice cores.

**L38** Add references to Beyond-EPICA Oldest Ice and the Little Dome C project.

**L89** Add references to the use of laser-ablation in ice cores studies and its possibilities.

**L139-141** References would be helpful here to justify that grain boundaries needs to be inferred from bulk measurements and that they size can greatly increase with impurities.

**L189** Does “bulk” here refers to the combination of ice and grain boundaries? If so perhaps precise it so bulk is not confused with the ice only (my first thought when I read the paragraph).

**Eqs 3 to 5** I would specify that the sources terms in Eq 4 and 5 also corresponds to BCs for Eqs 3 and 4.

**L230** Is there a reference for  $\alpha \sim 1$ ?

**Eqs 9 and 10** I would specify here that Eqs 9 and 10 are directly derived from Eqs 4 and 5, under the assumption of equilibrium fractionation at the vein/boundary/solid interfaces.

**L250** Add references to the mentioned past theories.

**L261** The form of the trial solution was explicitly chosen as a dampened traveling wave in Eq. 13 but this sentence could leave the feeling that the migration of the signal has been somewhat proven (rather than assumed). I would reformulate with something along the lines “As shown by the phase angle XX, the trial solution of Eq. 13 includes a potential vertical migration at the velocity XX.”

I also propose to replace “downward” by “vertical”, as I assume it would depend on the sign of the water flow.

**L282** Doesn't  $k_r$  require to be solved as well (along side the H pattern)?

**L299** It makes physical sense that the  $\xi$  is zero when there is no water flux (because then the isotopic signal is not traveling), but can it be justified a priori from the system of equation (perhaps already done in the literature)?

**L300** Why only the slowest-decaying eigenmode?

**L301-305** Perhaps add references about the mathematical techniques discussed here and examples where they have been used.

**L363** I do not really understand the normalization. It is normalized by the value of  $H$  at  $r=1$ ,  $\theta=L/2$ , and  $z=0$  (the last point missing in the text if I'm not wrong)?

**L373** Why these particular choices for  $\lambda$  and  $w$ ? I guess they correspond to typical values found in ice core, but extra context and justification would be a plus.

**Section 3.1** This section presents and discusses a lot of results and is therefore a bit dense to read. Perhaps adding sub-sections could help follow the argument set up by the author. For instance something as

*3.1.1 Impact of grain boundary and water flow on isotopic patterns*

*3.1.2 Impact of temperature*

*3.1.3 Impact of the bulk isotopic signal*

**L402** I would say that "the solution *overall* shows what the axisymmetric theories predict", as the presence of small distortions near the grain boundaries discussed later are a notable difference with previous theories.

**L449** I understand that the phase angle (defined in L261) is constant at the given position  $z$ , but is it really equal to zero? Or perhaps the phase angle here refers to the phase of  $H$  ( $\tan^{-1}(\text{Im}(H)/\text{Re}(H))$ ).

**L494-500** I would move this paragraph on the impact of the non-orthogonality between thin sections and triple junctions later in the text (L510). Here, I found that it cuts the reasoning on the impact of  $D_b$  and  $c$  on the spatial patterns.

**L499** "Only some triple junctions may show the archetypal patterns" Is it because the tilt make them unrecognizable or because the pattern itself will deviate from the model (model assumptions being not met in real ice)?

**L539** I would precise that the fact the patterns are unchanged does not presume that the enhancement factor is the same.

**L544** I do not understand why the bulk  $\delta$  signal has a scaled amplitudes  $\leq 1$  in the case of short-circuiting.

**L608** Perhaps add references for the impurities.

**L634** Add a reference to CFA technique.

### **Technical remarks:**

**Title** I would precise that the isotopes in questions are (stable) water isotopes.

**L1** I would also mention here that the article discusses stable water isotopes.

**L11** I would use "could explain" rather than "can explain".

**L19** Perhaps rephrase to “[...] and variations in  $\delta$  ranging from 1 to 10% of the amplitude of the bulk isotopic signal. This sets [...]”

**L20** Not sure the mention of the specific technique of laser-ablation mapping is necessary here.

**L126-127** “Equation” and “Figures” should be written in full at the start of a sentence. Also both the abbreviations “Eqn.” and “Eq.” are used in the article. I think TC guidelines require the use of “Eq.”.

**L169** The authors sometimes uses here  $\approx$  when the symbol  $\sim$  is used elsewhere to mean what I think is the same idea. Perhaps use the word “about”.

**Table 1** If possible perhaps also put the investigated grain boundary thicknesses.

**L204** corroborates

**L206** t is not defined at this point.

**Eq. 6** I would give the definition of  $\delta$  a bit above, when it first appears L228.

**L324** I would rather define BC the first time Boundary Condition is used.

**L327 and 660** I am not familiar with the use of “/” to mean respectively.

**Figure 4** I It might be a problem from my printing set up, but I cannot easily read the scale and axis values. Perhaps try to increase the resolution of the Figures and to increase the font of the Figures’ text. Also the use of dashed could help visualizing the black curve when it covered by the blue one.

**L545** Remove the hyphen in amplitudes

**L546** “Underestimation”?

**L550** Perhaps replace “single-crystal diffusion” by “crystal (or solid) diffusion alone” or by “diffusion in single-crystal”.

**L640** Is the reference to Ng (2023)?
